# Supplementary material for: Development of Plant-Produced Recombinant ACE2-Fc Fusion Protein as a Potential Therapeutic Agent Against SARS-CoV-2
Source: PubMed Central journal article supplement (PMC7874119; doi:10.3389/fpls.2020.604663), 2021-01-07

## **Plant-produced recombinant ACE2-Fc fusion protein as anti-SARS-CoV-2 agent**

Konlavat Siriwattananon<sup>1,2</sup>, Suwimon Manopwisedjaroen<sup>3</sup>, Phongthon Kanjanasirirat<sup>4</sup>, Priyo Budi Purwono<sup>3,5</sup>, Kaewta Rattanapisit<sup>1,2</sup>, Balamurugan Shanmugaraj<sup>1,2</sup> Duncan R. Smith<sup>6</sup>, Suparerk Borwornpinyo<sup>4</sup>, Arunee Thitithanyanont<sup>3</sup>, Waranyoo Phoolcharoen<sup>1,2\*</sup>

<sup>1</sup> Research unit for Plant-produced Pharmaceuticals, Chulalongkorn University, Bangkok, Thailand

<sup>2</sup> Department of Pharmacognosy and Pharmaceutical Botany, Faculty of Pharmaceutical Sciences, Chulalongkorn University, Bangkok, Thailand.

<sup>3</sup> Department of Microbiology, Faculty of Science, Mahidol University, Bangkok, Thailand

<sup>4</sup> Excellence Center for Drug Discovery (ECDD), Faculty of Science, Mahidol University, Bangkok 10400 Thailand

<sup>5</sup> Department of Microbiology, Faculty of Medicine, Universitas Airlangga, Surabaya, Indonesia

<sup>6</sup> Institute of Molecular Bioscience, Mahidol university, Salaya, Nakhon Prathom, Thailand

\*Correspondence: Waranyoo.P@chula.ac.th; Tel: 662-218-8359; Fax: 662-218-8357

**Figure S1.** Expression of spike protein of porcine epidemic diarrhea virus (PEDV) in *N. benthamiana*. Schematic representation showing the plant expression construct pBYR2e PEDV S1-His used (A). Diagrammatic representation showing the overview of transient expression of PEDV S1 protein in *N. benthamiana* (B). Western blotting of plant-produced PEDV S1 under reducing conditions. SARS-CoV-2 RBD-His from Sf9 cells (Genscript Biotech, USA) (lane 1 – positive control) and purified plant-produced PEDV S1-His (lane 2) probed with anti-His-HRP conjugate antibody. The red and black arrows indicate the presence of S1-His of PEDV and SARS-CoV-2 RBD-His, respectively (C).

**A**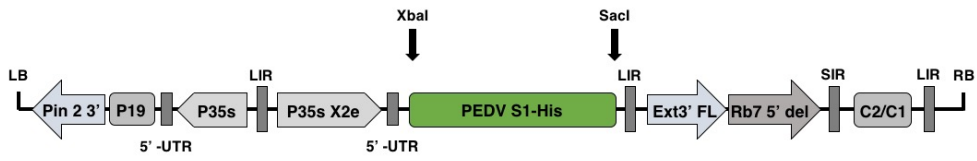**B**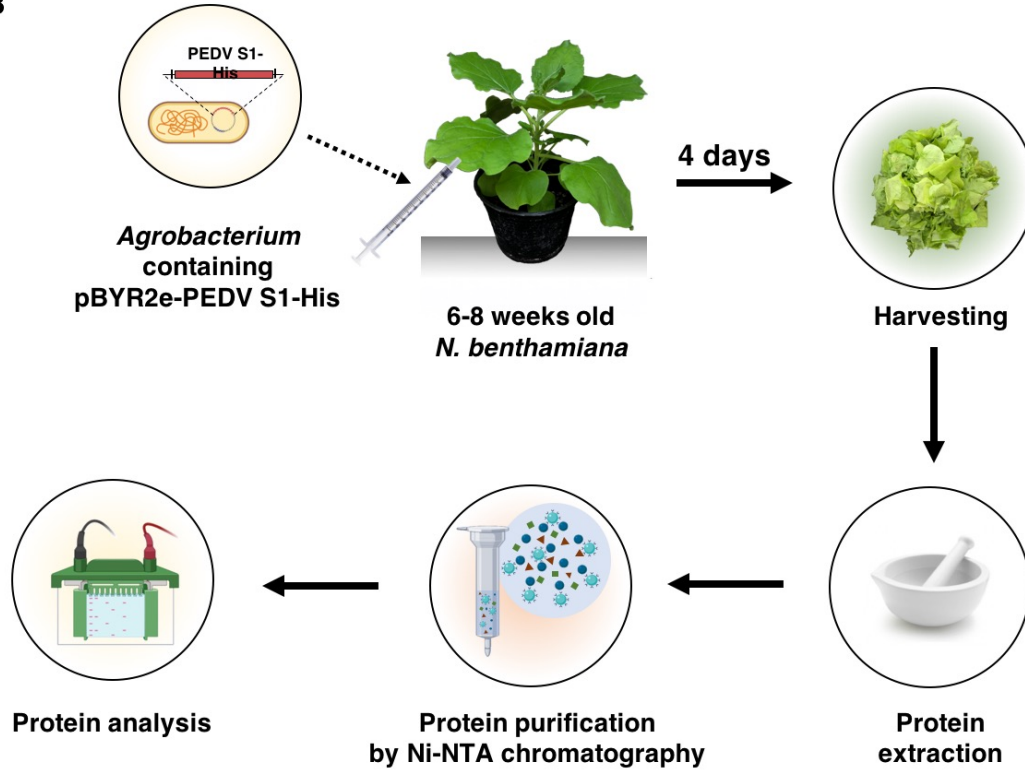**C**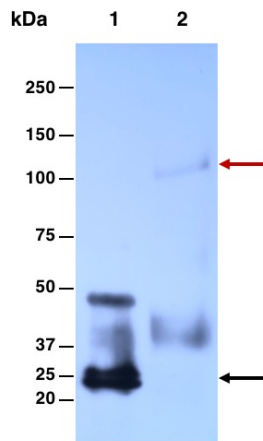

Supplement: Image_1.pdf [file Image_1.pdf]
